# Supplementary material for: Antivenin Plants Used for Treatment of Snakebites in Uganda: Ethnobotanical Reports and Pharmacological Evidences
Source: Preprints.org preprint supplement (doi:10.20944/preprints201910.0216.v1), 2019-10-18
Supplement: Supplementary file 3 [file supplementary]

## Sheet: ADDITIONAL FILE 1-OMARA ET AL
	Additional File 1. Family, local name, botanical name, life form, part used, conservation status, method of preparation and route of administration of antivenin plants used in Uganda.
	Plant family	Local name	Latin Botanical name	Life form (Vegetation type)	Part used	Conservation Status	Preparation and administration mode	Antivenin activity investigation	District (s)	References
	Acanthaceae	Nyante (Lus)	Asystasia schimperi T. Anders.	Herb	Root	W	Chewed	Not investigated	Kaliro	43
	Amaryllidaceae	Atungulu (Lang), Katungulu (Lug)	Allium cepa L.	Herb	Bulb	C	Leaves/root tuber pounded, sap applied on wound or chewed	Not investigated	Lira, Kaliro, Mukono/Buikwe	42,43,50
	Amaryllidaceae	Katunguluccumu (Lug)	Allium sativum L.	Herb	Bulb	C	Crush, smear at the bite.	Not investigated	Mukono/Buikwe	50
	Amaryllidaceae	Local name not known	Crinum kirkii	Shrub	Bulb	W	Not specified	Not investigated	Lira	42
	Amaryllidaceae	kasoota (Lug), Soota (Lus)	Scadoxus multiflorus (Haemanthus multiflorus)	Herb	Tuber, Root	C	Decoction drunk	Not investigated	Kampala, Kaliro	11,43
	Apocynaceae	Ekamuriei (Ateso)	Carrisa edulis	Shrub	Root	W	Not specified	Not investigated	Pallisa	51
	Apocynaceae	Busitani (Lus)	Thevetia peruviana (Pers.) Schumann	Shrub	Root	C	Infusion drunk	Not investigated	Kaliro	43
	Aristolochiaceae	Kankapu (Ateso)	Aristolochia tomentosa Sims.	Tree	Stem	C	Infusion, orally, unspecified dose	Not investigated	Pallisa	51
	Aristolochiaceae	Mukumya (Lug)	Aristolochia elegans Mast.	Liana	Root	W	Infusion drunk or root chewed	Not investigated	Kaliro	43
	Asclepiadaceae	Kafulu/muganga kiba (Lus)	Cryptolepis sanguinolenta	Climber	Root	W	Chewed, also rub at bite wound	Not investigated	Kaliro	43
			(Lindl.) Schltr
	Asparagaceae	Yat-twol (Lang)	Sansevieria dawei Stapf	Shrub	Root	W	Pounded root extract; induces immediate vomiting	Not investigated	Apac	39
			(Sansevieria species)
	Asparagaceae	Mother-in-law’s tongue (Eng) Akagoogwa (Lug)	Sansevieria trifasciata	Shrub	Root	W, C	Crushed and chewed or chewed directly	Not investigated	Kampala	11
	Asteraceae	Sere/labika (Lug), Kalala (Lus)	Bidens pilosa L.	Shrub	Leaves, whole plant	W	Crushed leaves rubbed on cuts as an astringent and antidote	Not investigated	Kaliro	43
	Asteraceae	Ekigango	Crassocephalum mannii (Hook.f.) Milne-Redh.	Herb	Fresh leaves	W	500 ml of infusion drunk once	Not investigated	Kabarole	36
	Asteraceae	Local name not cited	Echinops amplexicaulis Oliv.	Shrub	Root	W	Crushed, mixed in cold water	Not investigated	Oyam	47
							Extract drunk 2 glass/day
	Asteraceae	Kabilili akatono (Lus)	Microglossa pyrifolia (Lam.) O.	Shrub	Root	W	Infusion drunk; poultice	Not investigated	Kaliro	43
			Kuntze
	Asteraceae	Yat Kwong (Lang)	Vernonia cinerea (L) Less	Herb	Whole plant	W	Not specified	Not investigated	Lira, Kaliro	42,43
		Lukohe (Lug)
	Basellaceae	Enderema (Lug)	Basella alba L.	Climber	Whole plant	W	Plant crushed and packed onto the surface of the skin	Not investigated	Kabale	40
	Boraginacea	Agilo (Lang)	Trichodesma zeylanicum (L.) R.Br.	Tree	Root	W	Not specified	Not investigated	Lira	42
	Cleomaceae	Akeo (Lang)	Cleome gynandra L.	Shrub	Fresh leaves	W, C	Infusion drunk	Not investigated	Kabarole	36
		Eyobyo (Ru)
	Capparidaceae	Muzingani (Lus)	Capparis tomentosa Lam.	Shrub	Root	W	Infusion drunk	Not investigated	Kaliro	43
	Caricaceae	Apapalu (Lang), Paapali essajja (Lug), Mupapali omusaiza (Lus)	Carica papaya L.	Tree	Root	SW	Chew, poultice	Not investigated	Lira, Kaliro, Pallisa	42,43,51
							applied to bite wound
	Celastraceae	Eterka, Itereka (Lang)	Maytensus senegalensis (Lam) Exell.	Tree	Root, Leaves	W	Not specified	Not investigated	Lira	42
	Combretaceae	Odugu (Lang., Ach)	Combretum collinum Fresen	Tree	Root	W	Not specified	Not investigated	Lira	42
	Combretaceae	Loro (Lang)	Combretum molle G.don.	Tree	Root, Leaves	W	Not specified	Not investigated	Lira	42
	Commelinaceae	Muhinduka (Ru)	Murdannia simplex Vahl.	Shrub	Fresh leaves	W	Squeeze and drink	Not investigated	Kabarole	36
	Compositae	Local name not cited	Aspilia africana C.D Adams	Shrub	Root	W	Crushed, mixed in cold water	Not investigated	Oyam	47
							Extract drunk 1 glass twice/day
	Convolvulaceae	Musota taluma (Lug)	Hewittia sublobata L. Kuntze	Grass	Root, Tuber	W	Smear on head and bitten part	Not investigated	Mukono/Buikwe,	50
	Convolvulaceae	Icok (Lang), Mboli (Lus), Lumonde (Lug)	Ipomoea batatas (L.) Lam.	Herb	Root, Tuber	C	Chew	Not investigated	Kaliro	43
	Dracaenaceae	Kajjolyenjovu (Lus)	Dracaena steudneri Engl.	Herb	Leaves, Bark	W	Decoction, Pound and press on the bitten part	Not investigated	Mukono/Buikwe	50
	Ebenaceae	Kasalagala/Muda (Lus)	Euclea divinorum Hiern	Shrub	Root	W	Decoction drunk	Not investigated	Kaliro	43
	Euphorbiaceae	Helele (Lus)	Acalypha bipartita Muell. Arg.	Herb	Root	W	Poultice applied at bite wound	Not investigated	Kaliro, Wakiso	43,48
	Euphorbiaceae	Musogasoga (Lus)	Croton macrostachyus Hochst. ex. Delile	Tree	Root, Tuber	W	Pound and smear on the bite	Not investigated	Mukono/Buikwe	50
	Euphorbiaceae	Enkoni (Ru)	Euphorbia tirucalli L.	Shrub	Fresh leaves	W	Roast, squeeze & drink	Not investigated	Kabarole	36
	Euphorbiaceae	Omarorot (Lang), Ekiroowa (Lug), Kilowa (Lus)	Jatropha curcas L.	Shrub	Leaves, fruit	W, C	Latex applied at the bite, is poisonous, not usually ingested	Not investigated	Kaliro	43
	Euphorbiaceae	Ekisogasoga (Ru), Mukakale (Lus)	Ricinus communis L.	Tree	Stem bark, Root	W	Mix stem bark with black salt and chew, Infusion drunk	Not investigated	Kabarole, Kaliro	36,43
	Euphorbiaceae	Ilakara (Lang)	Securinega virosa (Willd) Baill.	Tree	Root	W	Not specified	Not investigated	Lira	42
	Fabaceae	Mufuhanduzi/muwela	Acacia seyal Del. var. fistula	Tree	Root	W	Not specified	Not investigated	Kaliro	43
		Manyo (Lus)	(Schweinf.) Oliv.
	Fabaceae	Mukongoito (Lus)	Acacia species	Tree	Root	W	Infusion drunk	Not investigated	Kaliro	43
	Fabaceae	Etek (Lang), Musita (Lug, Lus), Omusesa (Ru)	Albizia coriaria (Welw. ex) Oliver	Tree	Root	W	Infusion drunk	Not investigated	Kaliro	43
	Fabaceae	Kijanjalo (Lug)	Canavalia ensiformis L.D.C.	Climber	Leaves	W	Infusion, administered orally, dose not specified	Not investigated	Kampala	11
	Fabaceae	Awee (Lang), Kyeyo ekisaiza (Lus), Kabamba maliba (Lug)	Indigofera arrecta Host. A. Rich.	Herb	Root	W	Poultice, applied topically	Not investigated	Kaliro, Mukono/Buikwe	43,50
	Fabaceae	Mukitimbo (Lus)	Indigofera garckeana Vatk	Shrub	Root	W	Infusion drunk, root	Not investigated	Kaliro	43
							Chewed
	Fabaceae	Ocukulak (Lang)	Indigofera capitata Forsk.	Tree	Root	W	Not specified	Not investigated	Lira	42
		Awe Dyang (Lang)
	Fabaceae	Luganila (Lus)	Pseudarthria hookeri Wight & Arn.	Shrub	Root	W	Infusion used	Not investigated	Rakai, Kaliro	43,49
	Fabaceae	Kasagalyansasi (Lus)	Senna occidentalis (L.) Link	Herb	Root	W	Chew	Not investigated	Kaliro	43
	Fabaceae	Local name not known	Senna septemtrionalis (Viv.) I. et B.	Shrub	Flower, leaves	W	Crushed and packed into or onto the bite	Not investigated	Kabale	40
	Fabaceae	Kasia (Lus)	Senna siamea (Lam.) Irwin & Barneby	Tree	Root	C	Infusion drunk	Not investigated	Kaliro	43
	Fabaceae	Musumbila bafele	Senna singueana (Del.) Lock	Tree	Root	W	Infusion drunk	Not investigated	Kaliro	43
	Lamiaceae	Nfodo (Lus)	Hoslundia opposita Vahl	Shrub	Root	W	Chew and make poultice	Not investigated	Kaliro	43
	Lamiaceae	Ebiriri omutano (Ateso)	Plectranthus barbatus	Herb	Whole plant, leaves, stem, roots	W	Infusion	Not investigated	Mpigi, Pallisa	38,51
	Leguminosae	Omwitanjoka (Rut)	Cassia occidentalis L.	Shrub	Fresh leaves	W	Decoction drunk. Give 500 ml three times a day	Not investigated	Kabarole	36
	Liliaceae	Yat twol ororo (Lang)	Anthericum cameroneii Bak	Shrub	Root	W	Not specified	Not investigated	Lira	42
	Loganiaceae	Akwalaakwala (Lang)	Strychnos innocua Del.	Shrub	Root	W	Not specified	Not investigated	Lira	42
	Malvaceae	Bikadantama/Kitama tama (Lus)	Urena lobata L.	Herb	Leaves	W	Not specified	Not investigated	Kaliro	43
			Tristemma mauritianum J.F. Gmel.	Tree	Root	W	Not specified	Not investigated	Lira	42
	Melastomataceae	Alwedo , Alea (Lang)	Ekebergia capensis Sparrm	Tree	Roots, leaves	W	Maceration in water, administrered orally	Not investigated	Alebtong	45
	Meliaceae	Akwirakwir (Lang)	Trichilia ematica Vahl	Tree	Root, Leaves	W	Root extract mixed with that of Momordica foetida Schumach and an infusion drunk, leaves rubbed on cuts	Not investigated		39, 47
	Menispermaceae	Omanobya (Lang)	Cissampelos muchronata A.Rich.	Tree	Fruit cover	W	Pound leaves and tie on affected part	Not investigated	Lira, Mukono/Buikwe	42,50
		Kavamagombe (Lus)
	Moraceae	Mugaile (Lus)	Ficus natalensis Hochst.	Tree	Leaves	SW	Infusion drunk	Not investigated	Kaliro	43
	Myricaceae	Mukikimbo (Lug)	Morella kandtiana (Engl.)	Shrub	Roots	W	Chew and smear at the site of the bite	Not investigated	Mukono/Buikwe	50
			Verdic & Polhill
	Papillionaceae	Ederut (Ateso)	Ormocarpum trachycarpum	Shrub	Root	W	Infusion, administered orally	Not investigated	Pallisa	51
	Passifloraceae	Lugelogelo (Lus)	Adenia cissampeloides (Hook.)	Liana	Root	W	Chew	Not investigated	Kaliro	43
			Harms
	Poaceae	Lusenke (Lus)	Imperata cylindrica (L.) P. Beauv	Grass	Roots, leaves	W	Chew roots and tie leaves at the site of the bite	Not investigated	Kaliro, Mukono/Buikwe	43,50
	Poaceae	Owec kidi, Alioc (Lang)	Sporobolus pyramidalis P. Beauv.	Shrub	Root	W	Not specified	Not investigated	Kaliro	43
		Nakaselye (Lus)
	Polygalaceae	Awee ilila (Lang), Mukondwa (Lus), Eliloi (Ateso)	Securidaca longipedunculata Fres.	Shrub	Leaves, root, bark	W	Infusion drunk	Not investigated	Lira, Kaliro, Pallisa	42,43,51
	Rosaceae	Kawule (Lug)	Rubus rigidus Sm	Shrub	Leaves	W	Crush and tie on affected area	Not investigated	Mukono/Buikwe	50
	Rubiaceae	Lukoole/Kawuna (Lus)	Gardenia ternifolia Schumach. & Thonn.	Tree	Root	W	Infusion drunk	Not investigated	Kaliro	43
	Rutaceae	Amacunga (Lang), Mucungwa (Lus)	Citrus sinensis (L.) Osb.	Tree	Root	C, SW	Chewed, infusion drunk	Not investigated	Kaliro	43
	Rutaceae	Omumara (Ru)	Fagaropsis angolensis	Tree	Bark	W	Decoction taken	Not investigated	Kabarole	60
			(Engl.) Dale
	Simaroubaceae	Akere (Lang)	Harrisonia abyssinica Oliv.	Shrub	Root	W	Infusion drunk	Not investigated	Lira, Kaliro, Pallisa	42,43,51
		Lushaike (Lus)
		Ekeroi (Ateso)
	Solanaceae	Yat twol (Lang)	Datura stramonium L.	Shrub	Root, leaves, fruit	W	Not specified	Not investigated	Lira	42
	Solanaceae	Taba (Lang, Lug, Lus), Echimani (Ru)	Nicotiana tabacum L.	Shrub	Leaves	C	Chew and vomit the venom; Leaves juice applied on bite	Not investigated	Kaliro, Mukono/Buikwe	43,50,60
	Solanaceae	Ocokocok adongo (Lang)	Solanum aculeatissimum Jacq	Shrub	Root, flower	W	Crushed , mixed in cold	Not investigated	Lira, Oyam	42,47
							Water, Extract drunk
	Solanaceae	Ocokocok (Lang), Ntonka (Lus)	Solanum incanum L.	Herb	Root	W	Infusion drunk	Not investigated	Lira, Kaliro	42,43
	Umbifellifereae	Ilwilwi (Lang)	Steganotaenia araelicea Hoscht	Tree	Root, leaves	W	Not specified	Not investigated	Lira	42
	Verbenaceae	Owinybilo (Lang)	Lantana camara L.	Shrub	Root, leaves	W	Decoction, administered orally, dose not specified	Not investigated	Pallisa	51
		Kanpanga (Ateso)
	Languages: Ach-Acholi, Lang-Langi, Lug-Luganda, Lus-Lusoga, Ru-Rutoro; Conservation status : C-Cultivated, SW-Semi wild, W-Occur in the wild, Plants present in specific districts only have their local names in only such locations reported.
	Luganda and Lusoga are very closely related Bantu tonal languages. Langi and Acholi are very closely related languages. Preparation: Decoction: water extraction by boiling of dissolved plant material; Infusion: the plant
	material is added to hot water, left to steep for few minutes & taken as tea.
	A liana is a long-stemmed plant with woody vines that are rooted in the soil at ground level and uses trees, as well as other means of vertical support, to climb up the canopy to get access to well-lit areas of the forest
